# Supplementary material for: A monoclonal antibody that neutralizes SARS-CoV-2 variants, SARS-CoV, and other sarbecoviruses
Source: PubMed Central journal article supplement — bioRxiv. 2021 Oct 14:2021.10.13.464307. Preprint. [Version 1] doi: 10.1101/2021.10.13.464307 (PMC8528075; doi:10.1101/2021.10.13.464307), 2021-10-14
Supplement: media-1.pdf [file media-1.pdf]

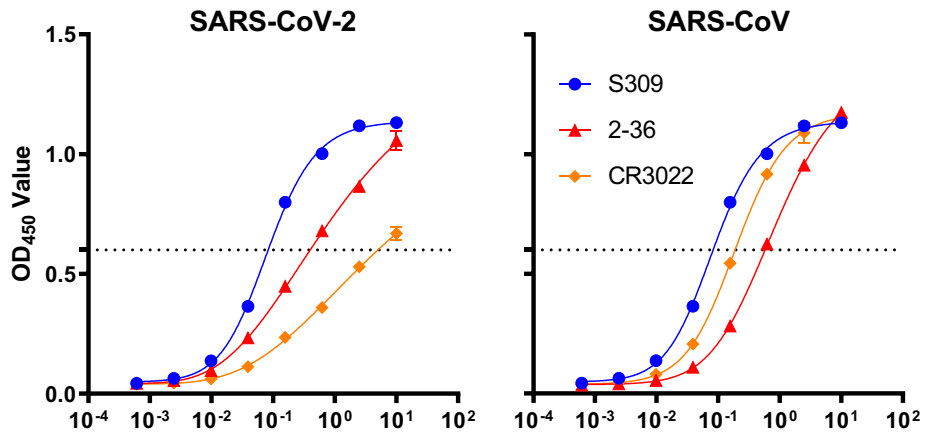

**Supplementary Figure 1.** Binding of 2-36 to SARS-CoV-2 and SARS-CoV spike as determined by ELISA.

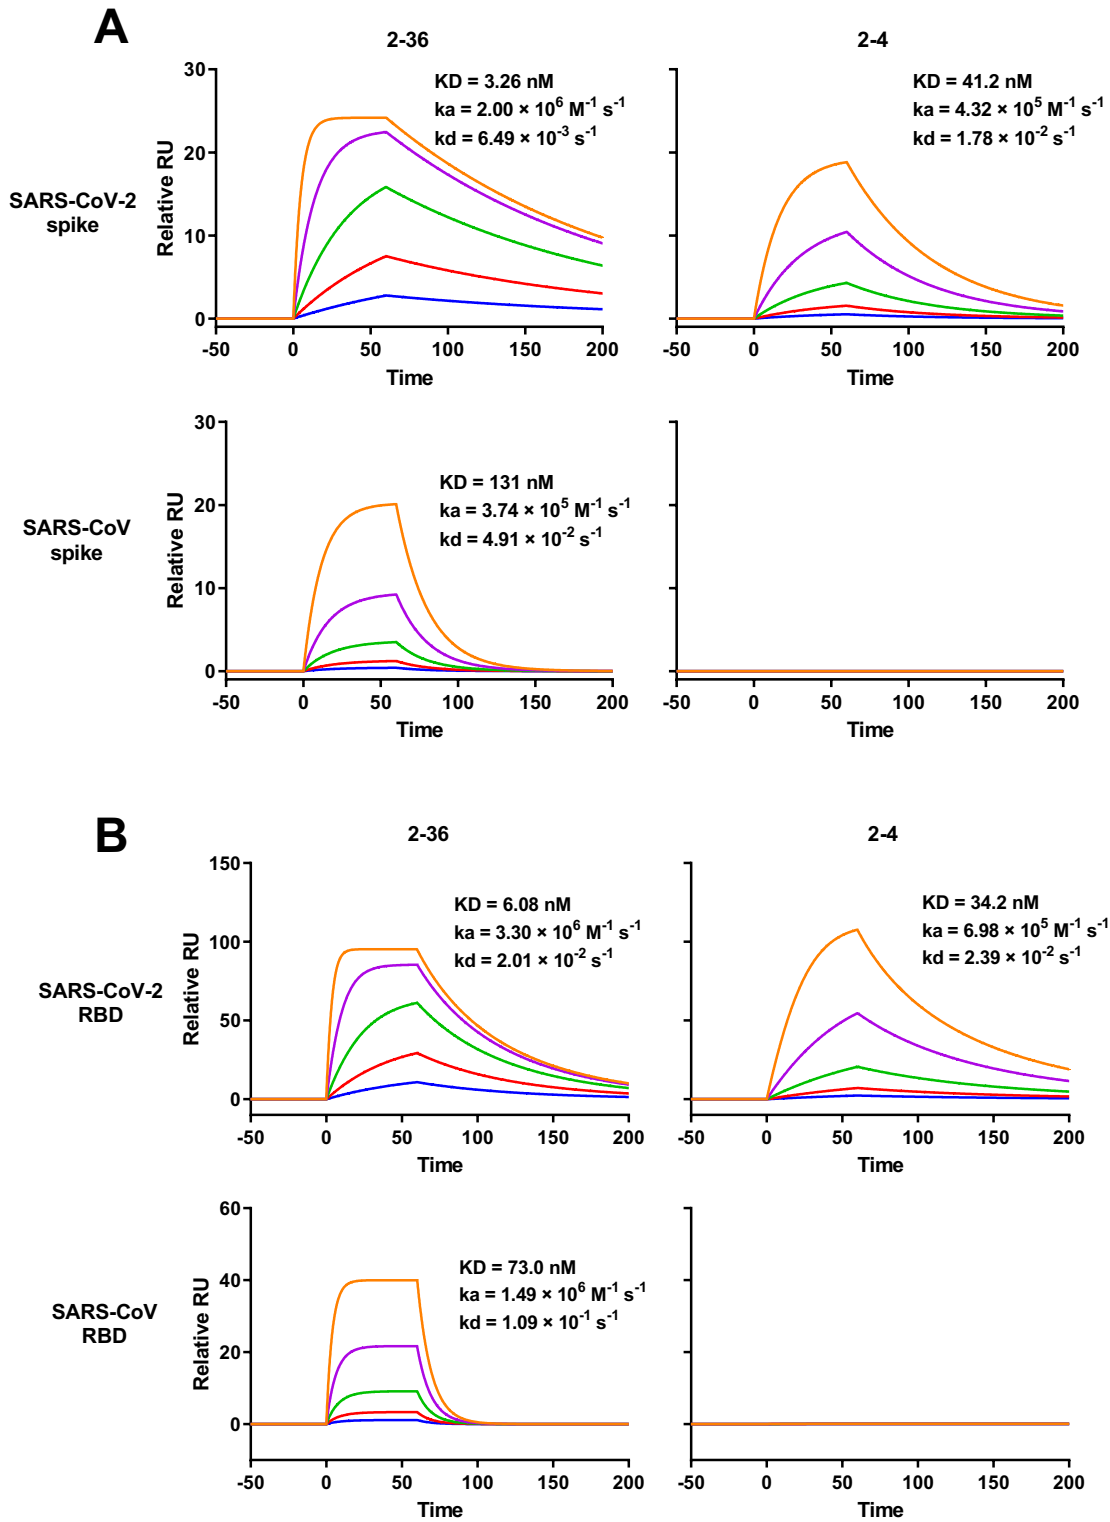

**Supplementary Figure 2.** 2-36 binding affinity to SARS-CoV-2 and SARS-CoV (a) spike or (b) RBD as measured by SPR.

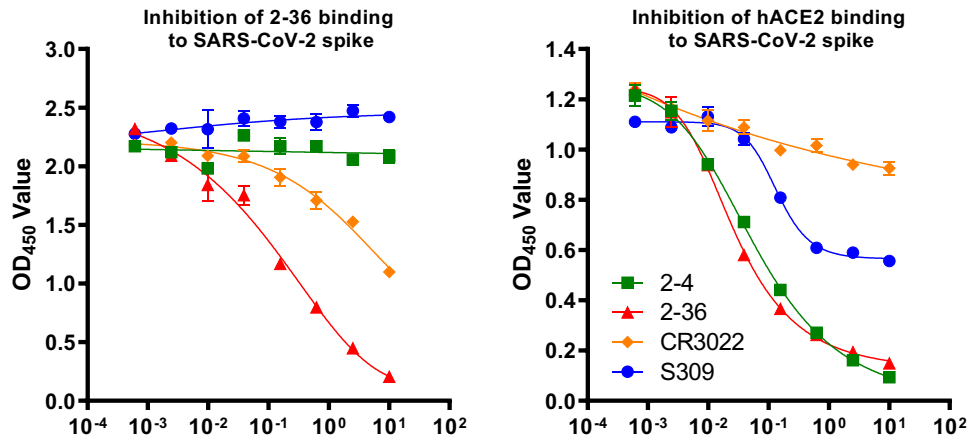

**Supplementary Figure 3.** 2-36 binding to SARS-CoV-2 spike is inhibited by CR3022; 2-36 inhibits hACE2 binding to SARS-CoV-2 spike.

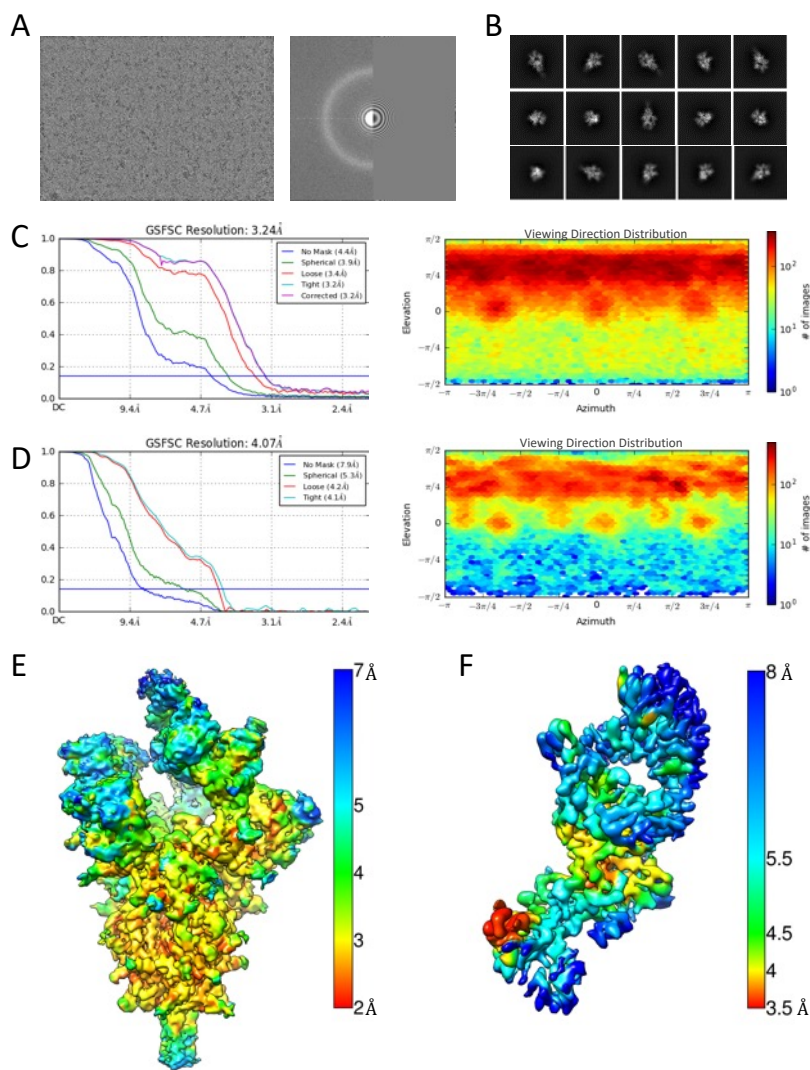

**Supplementary Figure 4. Cryo-EM data processing for antibody 2-36 in complex with the SARS-CoV-2 S trimer.**

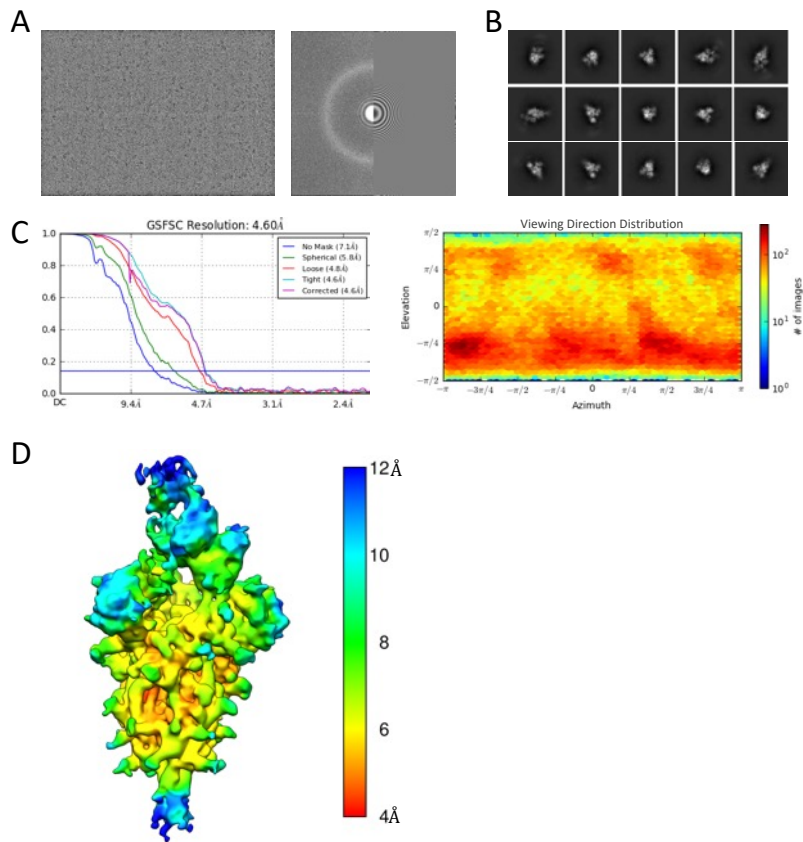

**Supplementary Figure 5. Cryo-EM data processing for antibody 2-36 in complex with the SARS-CoV S trimer.**

SARS-CoV-2 Wuhan-Hu-1 FASVYAWNRRKRISNCVADYSVLYNSASFSTFKCYGVSPTKLNDLCFTNVYADSFVIRGDEVROIA  
 SARS-CoV BJ01 . P . . . . . E . . . . . T F . . . . . A . . . . . S . . . . . V K . . D . . . . .

SARS-CoV-2 Wuhan-Hu-1 PGOTGKIADYNYKLPDDFGTCVIAWNSNNLDSKVGGNYNLYRLFRKSNLKPFFERDISTEIYQAGST  
 SARS-CoV BJ01 . . . . . V . . . . . M . . . . . L . . . . . T R . I . A T S T . . . . . K . . Y L . H G K . R . . . . . N V P F S P D G K

**Supplementary Figure 6. Sequence alignment for SARS-CoV-2 and SARS-CoV RBD binding interface of 2-36.**

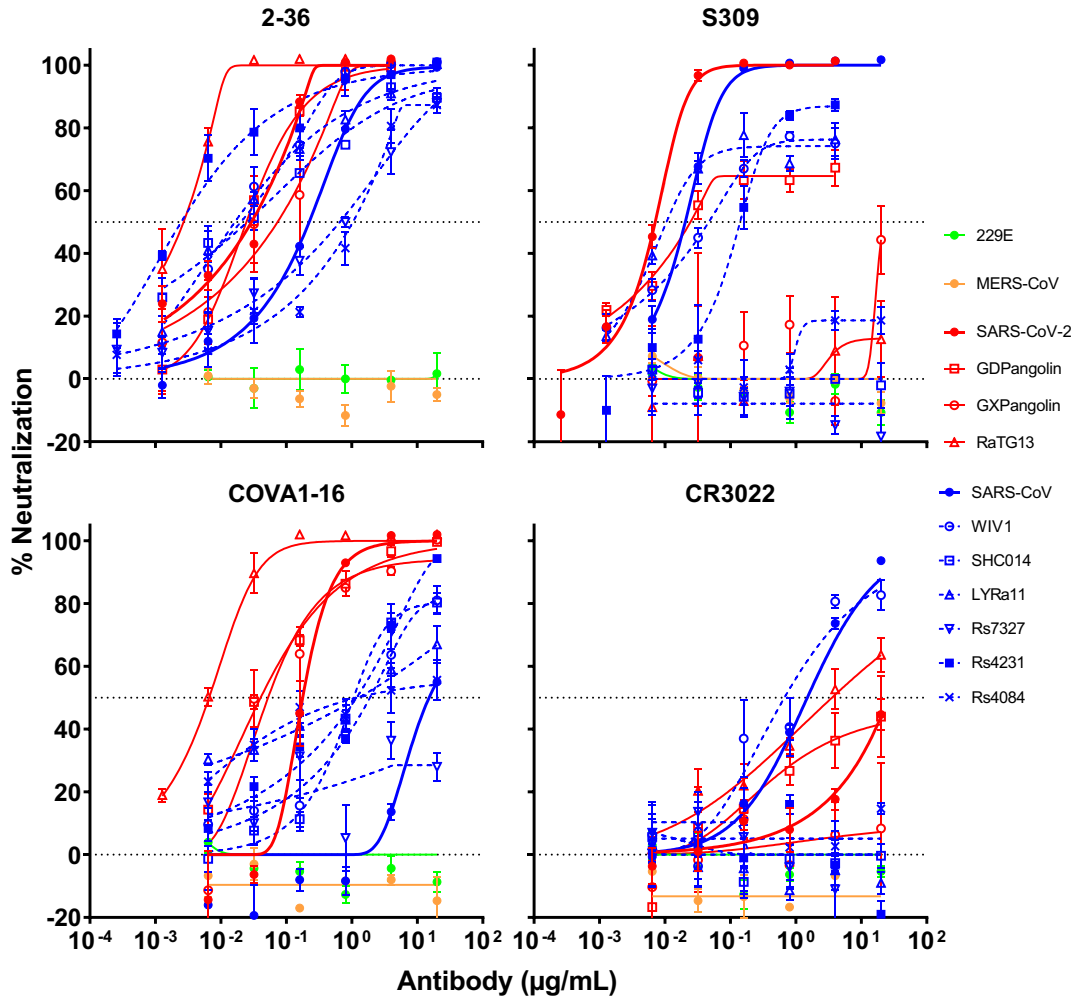

**Supplementary Figure 7.** 2-36 Neutralizes SARS-like coronaviruses using hACE2.

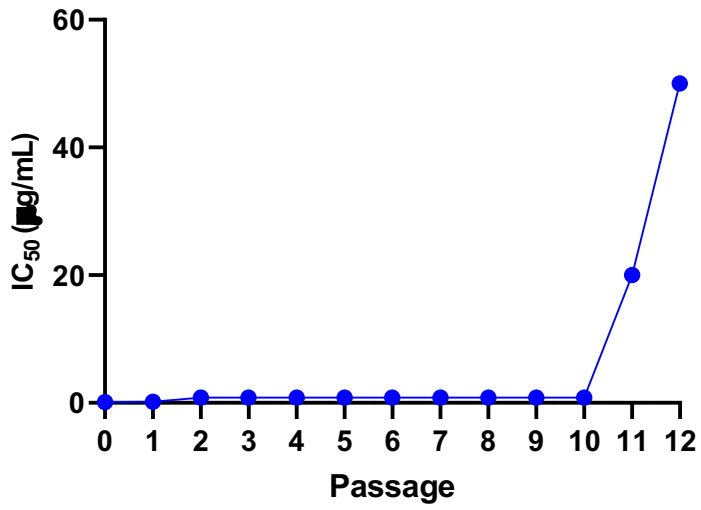

**Supplementary Figure 8.** 2-36 neutralization IC<sub>50</sub> (µg/mL) on the serially passaged virus.



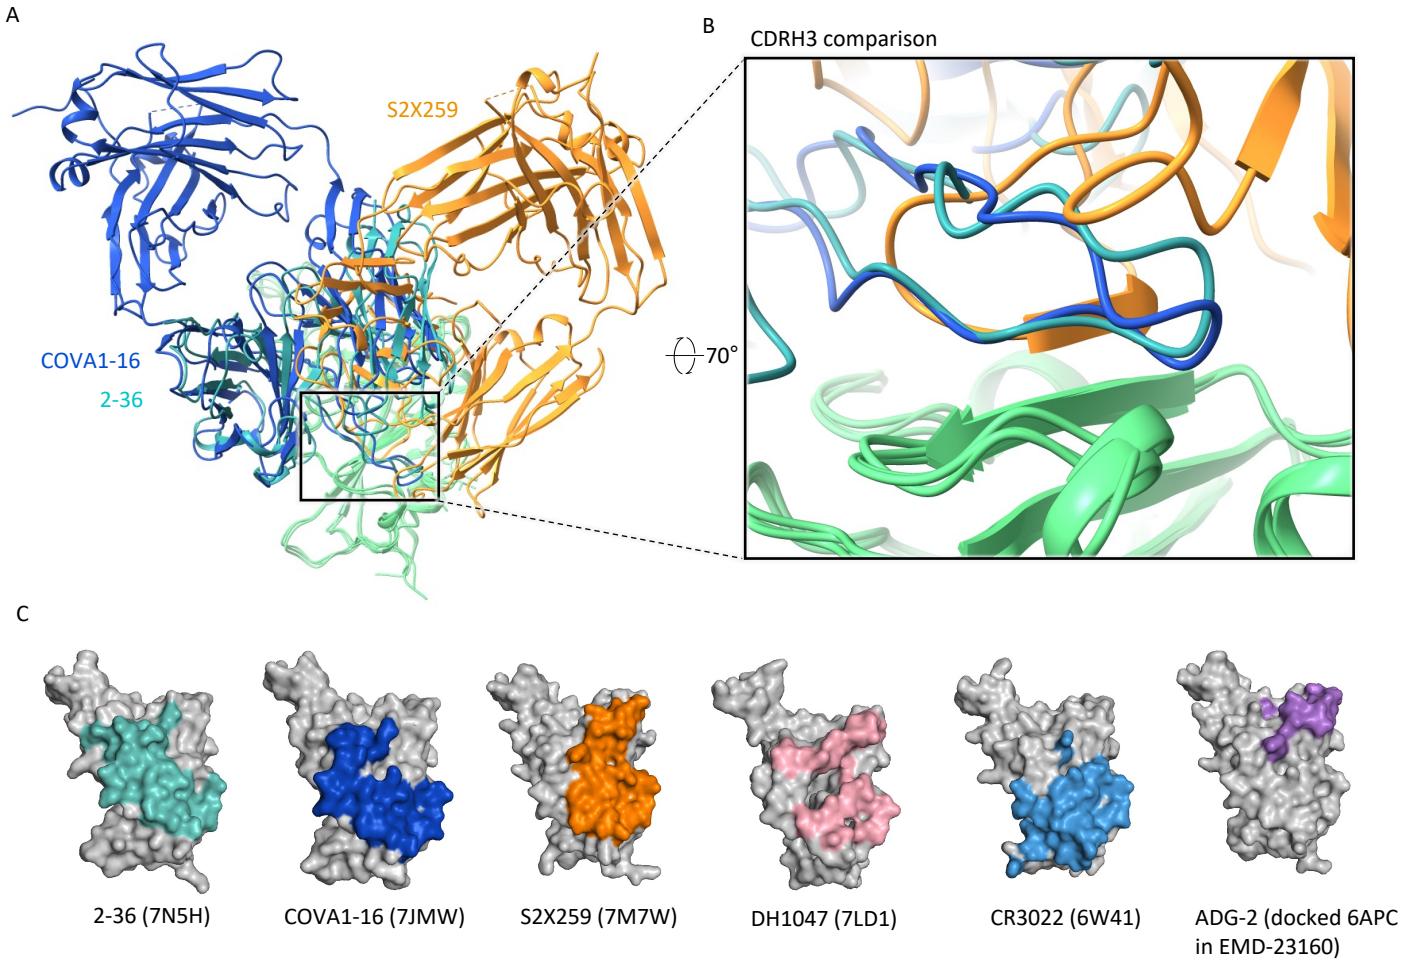

**Supplementary Figure 9. Structural comparison between antibody 2-36 in complex with SARS CoV-2 RBD and other published antibody structures.**

**Supplementary Table 1.** Cryo-EM data collection, processing, and model refinement and validation statistics. Related to Figure 2 and 4.

|                                                  | SARS-CoV-2 S2P + 2-36 Fab            | SARS-CoV S2P + 2-36 Fab |
|--------------------------------------------------|--------------------------------------|-------------------------|
| <b>EMDB ID</b>                                   | 24190                                |                         |
| <b>PDB ID</b>                                    | 7N5H                                 |                         |
| <b>Data Collection</b>                           |                                      |                         |
| Microscope                                       | FEI Titan Krios                      | FEI Titan Krios         |
| Voltage (keV)                                    | 300                                  | 300                     |
| Magnification                                    | 81000                                | 81000                   |
| Defocus Range ( $\mu\text{m}$ )                  | -0.8/-2.5                            | -0.8/-2.5               |
| Camera                                           | Gatan K3 BioQuantum                  | Gatan K3 BioQuantum     |
| Pixel Size ( $\text{\AA}/\text{pix}$ )           | 1.07                                 | 1.07                    |
| Recording Mode                                   | counting                             | counting                |
| Dose Rate ( $\text{e}/\text{pixel}/\text{s}$ )   | 16                                   | 16                      |
| Electron Dose ( $\text{e}/\text{\AA}^2$ )        | 42                                   | 42                      |
| <b>Data Processing</b>                           |                                      |                         |
| Software                                         | cryoSPARC v2.15                      | cryoSPARC v2.15         |
| Micrographs used                                 | 4,226                                | 3835                    |
| Number of Particles                              | 171,897                              | 80112                   |
| Symmetry                                         | C1                                   | C1                      |
| Box Size (pix)                                   | 440                                  | 440                     |
| Global Map FSC <sub>0.143</sub> ( $\text{\AA}$ ) | 3.24                                 | 4.60                    |
| Local Map FSC <sub>0.143</sub> ( $\text{\AA}$ )  | 4.07                                 |                         |
| <b>Refinement and Validation</b>                 |                                      |                         |
| Software                                         | Phenix 1.18                          |                         |
| Initial Model Used                               | 6BE2 (Fab), 7BZ5 (RBD), 6VXX (spike) |                         |
| Number of Atoms                                  | 29,691                               |                         |
| Protein Residues                                 | 3,739                                |                         |
| Ligands                                          | NAG: 41                              |                         |
| Model vs. Data CC (mask)                         | 0.72                                 |                         |
| RMS deviations                                   |                                      |                         |
| Bond lengths ( $\text{\AA}$ ) ( $\# >4\sigma$ )  | 2                                    |                         |
| Bond angles ( $^\circ$ ) ( $\# >4\sigma$ )       | 17                                   |                         |
| MolProbity Score                                 | 1.20                                 |                         |
| Clashscore (all atom)                            | 4.20                                 |                         |
| Poor rotamers (%)                                | 0.18                                 |                         |
| Ramachandran plot                                |                                      |                         |
| Favored (%)                                      | 98.34                                |                         |
| Allowed (%)                                      | 1.66                                 |                         |
| Outliers (%)                                     | 0.00                                 |                         |
